# Supplementary material for: The glucose-lowering effects of α-glucosidase inhibitor require a bile acid signal in mice
Source: Springer Nature journal article supplement (doi:10.1007/s00125-020-05095-7), 2020-02-08
Supplement: MOESM1 [file 17662178]

## **ESM methods**

### **Blood glucose and insulin tolerance tests**

After 6 hours fasting (from 8:00 hours to 14:00 hours), 22-week-old *Fxr* knockout mice and their littermates were subjected to intraperitoneal glucose tolerance tests (IPGTT), *in vivo* glucose-induced insulin secretion (GIIS) and insulin tolerance tests (ITT). Mice were injected intraperitoneally with 2 mg dextrose/kg body weight or 0.75 IU insulin/kg body weight (Novo Nordisk, Princeton, NJ). Blood glucose concentrations were measured by glucometers (Roche, Basel, Switzerland). Serum insulin concentrations were assayed by UltraSensitive Mouse Insulin ELISA kit (Alpco, Salem, New Hampshire, USA) via great saphenous bleeding.

### **16S rRNA gene sequencing of the gut microbiota and quantification of Bacterial DNA**

Bacterial DNA extraction of mouse colon content was followed as previously reported [1] and then subjected to PCR amplification and Illumina MiSeq sequencing. The v3-v4 region of the bacteria 16S ribosomal RNA gene was amplified using primers 341F, ACTCTACGGGAGGCAGCAG and 806R, GGACTACHVGGGTWTCTAAT. The qualified libraries were sequenced pair end on the Miseq system (Illumina, San Diego, California, USA). The clean reads were obtained as previous studies [2]. And tags were clustered to Operational Taxonomic Units (OTU) at 97% sequence similarity. OTU representative sequences were taxonomically classified using Ribosomal Database Project (RDP) Classifier v.2.2 trained on the Greengenes database, using 0.6 confidence values as cut off. At last, alpha diversity, beta diversity and the different species screening were analysed based on OTU and taxonomic ranks.

Real-time PCR amplification and detection was performed using the SYBR Green II Master (Takara, Kusatsu, Japan) on LightCycler 480 (Roche Applied Science, Indianapolis, USA), with the primers of total bacteria (UniF340, ACTCTACGGGAGGCAGCAGT and UniR514, ATTACCGCGGCTGCTGGC) [3]. Quantification of bacterial DNA was followed as previously reported [4].

### **Triglycerides and cholesterol measurement**

Plasma triglyceride (TG) and total cholesterol (TC), hepatic TG and TC in mice were measured by Quantification Colorimetric/Fluorometric Kit (Biovision, Milpitas, California, USA) according to the manufacturer's instructions. For hepatic lipids assay, liver tissues were homogenized in Folch solution (chloroform/methanol, 2:1, v/v) and the tissue lysates were extracted for further analysis.

### **Pancreatic beta cell mass measurement**

Pancreas were carefully removed from mice, weighed and then embedded and sectioned continuously. 9-10 evenly 200  $\mu$ m apart sections throughout the entire pancreas were analysed as previously described [5]. Digital images of sections were captured by ZEISS Axio Scan.Z1 Slide Scanner (Zeiss, Oberkochen, Germany). Total pancreatic and insulin-positive areas of each section were measured using Meta-Morph v7.1 software (Molecular Devices, Sunnyvale, CA USA).

### **Pancreatic insulin content**

Whole pancreatic tissue of mice was removed and weighed. Each pancreas was homogenized in acidic ethanol and rotated at 4°C for 48 hours and then centrifuged to collect the supernatant. The insulin level of the supernatant was determined by ELISA assay (Mouse Insulin ELISA kit, Alpco, Salem, New Hampshire, USA) and the total protein level was assayed

by BCA Protein Assay Kit (Thermo Fisher Scientific, Waltham, MA, USA).

#### **Islet isolation and *ex vivo* GIS assay**

Mice pancreas were injected with collagenase P (Roche, Basel, Switzerland) via the common hepatic bile duct and then digested at 37°C water bath, islets were then hand-picked under stereoscope [5]. Picked islets were either collected to snap-frozen in liquid nitrogen for RNA/Protein extraction or subjected to *ex vivo* batch GIS. Islets were cultured in RPMI 1640 with 10% FBS (Thermo Fisher Scientific) for 4 hours and then islets were switched to Krebs-Ringer HEPES buffer (KRB; 120 mmol/l NaCl, 4.8 mmol/l KCl, 2.5 mmol/l CaCl<sub>2</sub>, 1.2 mmol/l MgSO<sub>4</sub>, 1.2 mmol/l KH<sub>2</sub>PO<sub>4</sub>, 10 mmol/l NaHCO<sub>3</sub>) containing low glucose (3.3 mmol/l) or high glucose (16.7 mmol/l) for 1 hours. After supernatant was collected for insulin assay. The islets were lysed with acidic ethanol and subjected to further insulin assay using Mouse Insulin ELISA kit (Alpco).

#### **Immunolabelling assay**

Immunolabelling and image processing procedures were performed as previously described [5]. Antibodies were validated by utilizing negative control slides (primary or secondary antibody excluded). Fluorescence images were captured with OLYMPUS BX51 microscope (OLYMPUS, Tokyo, Japan). Quantification of Glucagon-positive, MafA-positive and Ki67-positive cell number, and Ucn3 fluorescence intensity were performed with ImageJ v1.48 (National Institutes of Health, Bethesda, MD, USA). At least 2000 insulin-positive cells or 50 islets from each mouse were counted for quantification. Primary antibodies and immunofluorescence secondary antibodies were diluted in DakoCytomation antibody diluent (Dako, Burlington, ON, Canada) at the reported dilution in ESM table 2.

#### **Real-time quantitative RT-PCR**

Total tissue RNA was extracted by TRIzol reagent (Invitrogen, Waltham, MA, USA) in accordance with the manufacturer's protocols. Total islet RNA was extracted using RNeasy Plus Micro kit (Qiagen, GmbH, Germany) and reverse transcription with the Reverse Transcription System Kit (Promega, Madison, USA) to cDNA. Real-time PCR amplification and detection were performed using the SYBR Green II Master (Takara, Kusatsu, Japan) on LightCycler 480 (Roche Applied Science, Indianapolis, USA). The sequences of all primers used in this study were listed in ESM Table 3. The expression levels were normalized to housekeeping *36b4* (also known as *Rplp0*) gene.

#### **Western blotting and antibodies**

Proteins were extracted from tissues in mice with RIPA buffer (Cell Signaling Technology, Beverly, MA, USA) and quantified using BCA Protein Assay Kit (Thermo Fisher Scientific). Proteins were separated by SDS-PAGE, subjected to electrophoretic transfer on nitrocellulose membranes and then blotted with primary antibodies, the blotting bands were illuminated by Immobilon Western Chemiluminescent HRP (Merck Millipore, Darmstadt, Germany) and captured with Image Quant LAS 4000 (GE Healthcare Life Sciences, Boston, USA). Primary antibodies and secondary antibodies were diluted in Tris-Buffered Saline Tween-20 (TBST) buffer containing 5% (wt/vol) Bovine Serum Albumin (BSA). Antibodies were validated by utilizing negative control (primary or secondary antibody excluded). Antibodies information was listed in ESM Table 2.

#### **RNA Sequencing of pancreatic islets**

The extracted RNA from isolated mice primary islet samples were subjected to library

construction and sequencing based on BGISEQ-500 platform [6]. RNA-seq raw data were initially filtered to obtain clean data after quality control, including removing adaptors, reads with more than 5% unknown bases and low-quality reads. Clean data were aligned to the mouse genome (mm10) by HISAT2 v2.0.4 software (The Johns Hopkins University, Baltimore, Maryland, USA). For gene expression analysis, DEGseq, a package in R software (v3.1.1), was used to detect differential expression genes (DEGs) [7, 8]. The significance of DEGs was defined by the combination of the absolute fold change  $\geq 2$  and q value  $\leq 0.001$  based on the poisson distribution. Functional pathway analysis of DEGs was performed by using phyper, a function of R software (v3.1.1). Z-score was calculated to normalize DEGs among each group by R software. Z-score:  $z=(x-\mu)/\sigma$ ,  $x$ =relative expression of each gene,  $\mu$ =mean of  $x$ ,  $\sigma$ =standard deviation of  $x$ .

### **Two-step Hyperglycaemic clamp on human type 2 diabetes subjects**

Two-step hyperglycaemic clamp was employed to evaluate beta cell function in drug naive type 2 diabetes patients who received AGI treatment [9]. The present study included the patients who participated in a 3-month intervention study to examine the antidiabetic effects of AGI as well as the gut microbiota disturbing effects registered in ClinicalTrials.gov. NCT01758471 [10]. The trial conformed to the provisions of the Declaration of Helsinki and was approved by the ethics committees at each participating centre. Ten of the patients treated by AGI agreed to receive and complete the hyperglycaemic clamp before treatment and 9 after treatment with consent form assigned. Two-step hyperglycaemic clamp were performed as previously described [9]. Briefly, the patients were subjected to the test in the early morning after overnight fasting. The blood glucose levels were stringently maintained around 14 mmol/l by monitoring blood glucose and continuous 20% glucose infusion at average rate of 6 mmol/l/KgBW/min via venous followed by a bolus of 50% glucose. The experiment lasted for at least 5 hours and was composed of two consecutive steps, first venous step (Step I, the hyperglycaemic clamp experiment following a venous glucose bolus) and then oral step (Step II, a second course of hyperglycaemic clamp following a carbohydrate meal). The oral step is used to appreciate the potential of incretin stimulated insulin secretion. Blood samples were taken every 2 min during Phase 1 and every 10 min during Phase 2 (ESM Table 6 and ESM Fig. 5). Serum insulin and C-peptide were measured by chemiluminescence (Roche Diagnostics Corp., Indianapolis, In, USA)

### **Antibiotic pre-treatment**

For antibiotic treatment, mice were randomly divided into db and db Abx group upon purchase. The db group were subjected to only drinking water throughout the experiment, and the Abx group treated with antibiotic cocktail containing ampicillin (1 g/l), neomycin (1 g/l), streptomycin (1 g/l) and doxycycline (1 g/l) in the drinking water for 12 days before AGI treatment. Antibiotics were purchased from Sigma Aldrich, St. Louis, USA.

**ESM Table 1. Diet formulas**

| <b>D10012G (chow diet for <i>db/db</i> mice)</b> | <b>g%</b> | <b>kJ%</b> |
|--------------------------------------------------|-----------|------------|
| Protein                                          | 20        | 20         |
| Carbohydrate                                     | 64        | 64         |
| Fat                                              | 7         | 16         |
| Total                                            |           | 100        |
| kJ/g                                             | 16.736    |            |
| Ingredient                                       | g         | kJ         |
| Casein                                           | 200       | 3347.2     |
| L-Cystine                                        | 3         | 50.2       |
| Corn Starch                                      | 397.486   | 6652.6     |
| Maltodextrin 10                                  | 132       | 2209.2     |
| Sucrose                                          | 100       | 1673.6     |
| Cellulose, BW200                                 | 50        | 0          |
| Soybean Oil                                      | 70        | 2635.9     |
| t-Butylhydroquinone                              | 0.014     | 0          |
| Mineral Mix S10022G                              | 35        | 0          |
| Vitamin Mix V10037                               | 10        | 167.4      |
| Choline Bitartrate                               | 2.5       | 0          |
| Dye, Red                                         | 0         | 0          |
| Dye, Yellow                                      | 0         | 0          |
| Total                                            | 1000      | 16736      |
| <b>D12266B (HFHS diet)</b>                       | <b>g%</b> | <b>kJ%</b> |
| Protein                                          | 16.8      | 16.8       |
| Carbohydrate                                     | 51.4      | 51.4       |
| Fat                                              | 31.8      | 31.8       |
| Total                                            |           | 100        |
| kJ/g                                             | 18.451    |            |
| Ingredient                                       | g         | kJ         |
| Casein, 30 Mesh                                  | 190       | 3179.8     |
| DL-Methionine                                    | 3         | 50.2       |
| Corn Starch                                      | 215       | 3598.2     |
| Maltodextrin 10                                  | 75        | 1255.2     |
| Sucrose                                          | 290       | 4853.4     |
| Cellulose, BW200                                 | 30        | 0          |
| Butter Fat, Anhydrous                            | 44.2      | 1664.4     |
| Corn Oil                                         | 118       | 4443.4     |
| Mineral Mix S10001                               | 40        | 0          |
| Calcium Carbonate                                | 5.5       | 0          |
| Sodium Chloride                                  | 5.5       | 0          |
| Potassium Citrate, 1 H <sub>2</sub> O            | 13.5      | 0          |
| Vitamin Mix V10001                               | 11        | 184.1      |
| Choline Bitartrate                               | 2         | 0          |
| FD&C Yellow Dye #5                               | 0         | 0          |

|                  |        |       |
|------------------|--------|-------|
| FD&C Red Dye #40 | 0.1    | 0     |
| Total            | 1042.8 | 19233 |

---

**ESM Table 2. Antibodies for Immunolabelling assay and Western blot analysis**

| Antibody                                                     | Dilution (vol/vol)  | Source                                            | Catalogue    | RRID       |
|--------------------------------------------------------------|---------------------|---------------------------------------------------|--------------|------------|
| guinea pig anti-insulin                                      | 1:200 <sup>A</sup>  | Abcam, Cambridge, MA, USA                         | ab7842       | AB_306130  |
| mouse anti-Glucagon                                          | 1:400 <sup>A</sup>  | Abcam, Cambridge, MA, USA                         | ab10988      | AB_297642  |
| rabbit anti-MafA                                             | 1:1000 <sup>A</sup> | Bethyl, Montgomery, TX, USA                       | IHC-00352    | AB_1279486 |
| rabbit anti-Ucn3                                             | 1:400 <sup>A</sup>  | Phoenix Pharmaceuticals, Belmont, California, USA | H-019-29     | N/A        |
| rabbit anti-Ki67                                             | 1:400 <sup>A</sup>  | Bethyl, Montgomery, TX, USA                       | IHC-00375    | AB_1547959 |
| Alexa Fluor® 488 AffiniPure Donkey Anti-Guinea Pig IgG (H+L) | 1:500 <sup>A</sup>  | Jackson ImmunoResearch, West Grove, PA, USA       | 706-545-148  | AB_234472  |
| Alexa Fluor® 594 AffiniPure Goat Anti-Rabbit IgG (H+L)       | 1:500 <sup>A</sup>  | Jackson ImmunoResearch, West Grove, PA, USA       | 111-585-003  | AB_2338059 |
| Alexa Fluor® 594 AffiniPure Donkey Anti-Mouse IgG (H+L)      | 1:500 <sup>A</sup>  | Jackson ImmunoResearch, West Grove, PA, USA       | 715-585-150  | AB_2340854 |
| rabbit anti-Shp                                              | 1:1000 <sup>B</sup> | Abcam, Cambridge, MA, USA                         | ab186874     | AB_2797389 |
| mouse anti-Fxr                                               | 1:1000 <sup>B</sup> | R&D Systems, Minneapolis, MN, USA                 | PP-A9033A-00 | AB_1962505 |
| rabbit anti-TUBULIN                                          | 1:5000 <sup>B</sup> | Cell Signaling Technology, Boston, MA, USA        | #2144        | AB_2210548 |
| Anti-rabbit IgG, HRP-linked Antibody                         | 1:2000 <sup>B</sup> | Cell Signaling Technology, Boston, MA, USA        | #7074        | AB_2099233 |
| Anti-mouse IgG, HRP-linked Antibody                          | 1:2000 <sup>B</sup> | Cell Signaling Technology, Boston, MA, USA        | #7076        | AB_330924  |

<sup>A</sup>Dilution selected for Immunolabelling assay.

<sup>B</sup>Dilution selected for Western blot analysis.

**ESM Table 3. RT-PCR primers**

| Gene symbol                      | Forward primer           | Reverse primer           |
|----------------------------------|--------------------------|--------------------------|
| <i>36b4*</i>                     | GAAACTGCTGCCTCACATCCG    | GCTGGCACAGTGACCTCACACG   |
| <i>Asbt</i>                      | GTCTGTCCCCCAAATGCAACT    | CACCCCATAGAAAACATCACCA   |
| <i>Bsep</i>                      | TGGTGATTCTCGCTGTCAGT     | GCAGCCACTGTTCTGAATAGA    |
| <i>Cidea</i>                     | TGACATTCATGGGATTGCAGAC   | GGCCAGTTGTGATGACTAAGAC   |
| <i>Cyp27a1</i>                   | CCAGGCACAGGAGAGTACG      | GGGCAAGTGCAGCACATAG      |
| <i>Cyp7a1</i>                    | AGCAACAACAACCTGCCAGTACTA | GTCCGGATATTCAAGGATGCA    |
| <i>Cyp7b1</i>                    | GGAGCCACGACCCTAGATG      | TGCCAAGATAAGGAAGCCAAC    |
| <i>Cyp8b1</i>                    | CCTCTGGACAAGGGTTTTGTG    | GCACCGTGAAGACATCCCC      |
| <i>Fgf15</i>                     | GCCATCAAGGACGTCAGCA      | CTTCCTCCGAGTAGCGAATCAG   |
| <i>Fgfr4</i>                     | TTTCTAGTTCCCCAAAACCTAG   | ACACCAGAGCTGATGCCCTTT    |
| <i>Fxr</i>                       | CCTGAGAACCCACAGCATTT     | GTGTCCATCACTGCACATCC     |
| <i>G6pc</i>                      | CGACTCGCTATCTCCAAGTGA    | GGGCGTTGTCCAAACAGAAT     |
| <i>Ibabp</i>                     | CTTCCAGGAGACGTGATTGAAA   | CCTCCGAAGTCTGGTGATAGTTG  |
| <i>Ntcp</i>                      | ATCTGACCAGCATTGAGGCTCT   | CCGTCGTAGATTCCTTTGCTGT   |
| <i>Oatp</i>                      | CAGTCTTACGAGTGTGCTCCAGAT | ATGAGGAATACTGCCTCTGAAGTG |
| <i>Ost<math>\alpha</math></i>    | TGTTCCAGGTGCTTGTCATCC    | CCACTGTTAGCCAAGATGGAGAA  |
| <i>Ost<math>\beta</math></i>     | CAGTCTTACGAGTGTGCTCCAGAT | ATGAGGAATACTGCCTCTGAAGTG |
| <i>Pepck</i>                     | TGACAGACTCGCCCTATGTG     | CCCAGTTGTTGACCAAAGGC     |
| <i>Shp</i>                       | TCTGCAGGTCGTCCGACTATTC   | AGGCAGTGGCTGTGAGATGC     |
| <i><math>\beta</math>-klotho</i> | TGTCAACGGCACAGACAGAT     | CGCATTCACTGCTGCTACTG     |

\*, also known as *Rplp0*

**ESM Table 4. Statistical significance of differences in the percentage of each bile acid species in *db/db* mice plasma, liver and cecum content related to ESM Fig. 2a**

|        | (%of total BAs) | db          | db AGI      | p value<br>(db vs db AGI) |
|--------|-----------------|-------------|-------------|---------------------------|
| Plasma | CA              | 1.96±0.61   | 28.06±7.73  | 0.015                     |
|        | CDCA            | 1.45±0.38   | 1.89±0.47   | 0.328                     |
|        | αMCA            | 0.05±0.03   | 0.31±0.09   | 0.015                     |
|        | βMCA            | 1.15±0.51   | 1.61±0.59   | 0.382                     |
|        | UDCA            | 0.09±0.06   | 0.22±0.1    | 0.382                     |
|        | TCA             | 49.23±4.5   | 51.35±8.84  | 1                         |
|        | TCDCA           | 1.41±0.31   | 0.7±0.21    | 0.038                     |
|        | TαMCA           | 2.14±0.44   | 1.42±0.21   | 0.234                     |
|        | TβMCA           | 6.22±0.99   | 1.03±0.2    | <0.001                    |
|        | DCA             | 27.04±7.03  | 9.67±1.75   | 0.05                      |
|        | ωMCA            | 4.5±1.11    | 0.7±0.25    | 0.003                     |
|        | TDCA            | 1.01±0.32   | 1.5±0.67    | 1                         |
|        | Liver           | CA          | 0.19±0.09   | 1.36±0.78                 |
| CDCA   |                 | 0.04±0.01   | 0.02±0.01   | 0.461                     |
| αMCA   |                 | 0.05±0.01   | 0.05±0.02   | 0.808                     |
| βMCA   |                 | 0.58±0.15   | 0.14±0.06   | 0.016                     |
| TCA    |                 | 81.95±0.93  | 93.01±1.22  | 0.004                     |
| TCDCA  |                 | 1.82±0.28   | 1.17±0.28   | 0.368                     |
| TαMCA  |                 | 2.14±0.24   | 1.78±0.27   | 0.461                     |
| TβMCA  |                 | 10.04±1.15  | 1.11±0.19   | 0.004                     |
| TUDCA  |                 | 1.7±0.16    | 0.19±0.03   | 0.004                     |
| DCA    |                 | 0.01±0      | 0.03±0.03   | 0.461                     |
| ωMCA   |                 | 0.33±0.12   | 0.03±0.02   | 0.008                     |
| TDCA   |                 | 1.02±0.39   | 0.99±0.91   | 0.57                      |
| Cecum  |                 | CA          | 19.6±6.57   | 13.08±4.63                |
|        | CDCA            | 0.7±0.19    | 1.8±0.59    | 0.214                     |
|        | αMCA            | 7.23±2.98   | 2.76±0.89   | 0.683                     |
|        | βMCA            | 14.64±3.39  | 28.05±11.05 | 0.368                     |
|        | UDCA            | 0.95±0.3    | 0.85±0.32   | 0.933                     |
|        | TCA             | 11.19±5.29  | 10.22±8.07  | 1                         |
|        | TαMCA           | 2.3±1.11    | 11.74±4.93  | 0.073                     |
|        | TβMCA           | 2.35±1.05   | 11.35±2.82  | 0.008                     |
|        | DCA             | 31.75±11.93 | 14.15±13.71 | 0.214                     |
|        | LCA             | 1.47±0.64   | 1.31±1.07   | 1                         |
|        | TDCA            | 0.52±0.21   | ND          | -                         |

Data are presented as mean±SEM. ND, not detected. P values calculated by Mann-Whitney U test. CA, cholic acid; CDCA, chenodeoxycholic acid; MCA, murine cholic acid; UDCA, ursodeoxycholic acid; TCA, taurine conjugated CA; TCDCA, taurine conjugated CA; TαMCA, taurine conjugated alpha MCA; TβMCA, taurine conjugated beta MCA; TUDCA, taurine conjugated UDCA; DCA, deoxycholic acid; LCA, lithocholic acid; TDCA, taurine conjugated DCA; TLCA, taurine conjugated LCA; TωMCA, taurine conjugated omega MCA.



**ESM Table 5. Statistical significance of differences in the percentage of each bile acid species in HFHS mice plasma, liver, cecum content and ileum related to Fig. 3a**

| (%of total BAs) | WT         | WA         | KO         | KA          | p value<br>(WT vs WA) | p value<br>(KO vs KA) | p value<br>(WT vs KO) | p value<br>(WA vs KA) |
|-----------------|------------|------------|------------|-------------|-----------------------|-----------------------|-----------------------|-----------------------|
| Plasma          |            |            |            |             |                       |                       |                       |                       |
| CA              | 6.98±1.36  | 30.77±2.41 | 9.53±1.19  | 13.57±4.01  | 0.001                 | 0.606                 | 0.606                 | 0.005                 |
| CDCA            | 1.35±0.21  | 3.03±0.63  | 0.47±0.11  | 0.2±0.05    | 0.035                 | 0.031                 | 0.002                 | 0.001                 |
| αMCA            | 0.85±0.11  | 4.24±0.78  | 0.46±0.11  | 0.68±0.26   | 0.001                 | 0.758                 | 0.042                 | 0.001                 |
| βMCA            | 6.91±0.83  | 25.24±2.07 | 3.95±0.69  | 7.34±1.88   | 0.001                 | 0.21                  | 0.012                 | 0.001                 |
| UDCA            | 0.73±0.11  | 1.23±0.32  | 0.36±0.1   | 0.08±0.03   | 0.234                 | 0.005                 | 0.031                 | 0.001                 |
| TCA             | 11.63±1.33 | 8.99±3.59  | 28.99±4.06 | 52.44±10.19 | 0.366                 | 0.071                 | <0.001                | 0.005                 |
| TCDCa           | 1.52±0.42  | 0.64±0.31  | 0.78±0.18  | 0.14±0.04   | 0.181                 | <0.001                | 0.091                 | 0.366                 |
| TαMCA           | 5.38±0.84  | 2.25±0.75  | 2.71±0.47  | 0.7±0.15    | 0.035                 | <0.001                | 0.023                 | 0.101                 |
| TβMCA           | 11.3±1.43  | 4.72±1.52  | 7.51±0.99  | 9.46±3.24   | 0.014                 | 0.918                 | 0.055                 | 0.628                 |
| TUDCA           | 4.57±1.28  | 0.71±0.23  | 1.73±0.39  | 0.4±0.13    | 0.005                 | 0.005                 | 0.042                 | 0.181                 |
| DCA             | 11.41±0.98 | 1.15±0.97  | 15.2±2.49  | 3.55±2.31   | 0.001                 | 0.008                 | 0.47                  | 0.534                 |
| ωMCA            | 24.46±4.59 | 15.87±5.98 | 13.93±2.41 | 7.7±3.92    | 0.181                 | 0.142                 | 0.071                 | 0.181                 |
| TDCA            | 3.93±0.63  | 0.05±0.05  | 6.7±0.55   | 0.49±0.32   | 0.001                 | <0.001                | 0.008                 | 0.628                 |
| TωMCA           | 6.5±0.77   | 0.67±0.22  | 6.1±1.27   | 2.09±0.93   | 0.001                 | 0.023                 | 0.681                 | 0.534                 |
| Liver           |            |            |            |             |                       |                       |                       |                       |
| CA              | 0.87±0.3   | 10.17±4.22 | 2.38±0.9   | 5.62±1.84   | 0.002                 | 0.219                 | 0.107                 | 0.487                 |
| CDCA            | 0.08±0.02  | 0.05±0.01  | 0.04±0.01  | 0.03±0.02   | 0.173                 | 0.006                 | 0.107                 | 0.011                 |
| αMCA            | 0.29±0.05  | 0.78±0.29  | 0.38±0.09  | 0.2±0.09    | 0.918                 | 0.039                 | 1                     | 0.032                 |
| βMCA            | 1.06±0.13  | 1.65±0.64  | 2.2±0.5    | 0.77±0.27   | 0.468                 | 0.014                 | 0.203                 | 0.525                 |
| UDCA            | 0.04±0.01  | 0.06±0.03  | 0.06±0.01  | 0.02±0.01   | 0.197                 | <0.001                | 0.821                 | 0.169                 |
| TCA             | 41.33±1.76 | 55.69±4.14 | 61.93±2.7  | 81.97±3.84  | 0.016                 | <0.001                | <0.001                | <0.001                |
| TCDCa           | 2.13±0.25  | 2.01±0.27  | 0.88±0.08  | 0.39±0.08   | 0.863                 | <0.001                | <0.001                | <0.001                |
| TαMCA           | 7.41±0.6   | 4.93±1.02  | 3.52±0.34  | 0.87±0.3    | 0.016                 | <0.001                | <0.001                | <0.001                |
| TβMCA           | 37.26±2.3  | 23.08±3.34 | 18.97±1.97 | 6.77±1.49   | 0.003                 | <0.001                | <0.001                | <0.001                |
| TUDCA           | 2.44±0.14  | 1.19±0.25  | 1.23±0.11  | 0.26±0.06   | 0.002                 | <0.001                | <0.001                | <0.001                |

|       |           |           |           |           |        |        |       |       |
|-------|-----------|-----------|-----------|-----------|--------|--------|-------|-------|
| DCA   | 0.43±0.2  | 0.11±0.05 | 0.22±0.09 | 0.21±0.09 | 0.043  | 0.347  | 0.381 | 0.88  |
| ωMCA  | 1.62±0.36 | 0.24±0.16 | 1.64±0.31 | 0.21±0.08 | <0.001 | <0.001 | 0.872 | 0.151 |
| TDCA  | 4.63±0.6  | 0.02±0.02 | 6.37±1.23 | 2±1.02    | <0.001 | 0.004  | 0.418 | 0.004 |
| TLCA  | 0.19±0.05 | 0.01±0    | 0.08±0.02 | 0.02±0.01 | <0.001 | <0.001 | 0.05  | 1     |
| TωMCA | 0.22±0.03 | 0.01±0    | 0.09±0.01 | 0.04±0.01 | <0.001 | 0.008  | 0.001 | 0.651 |

Cecum content

|       |            |            |            |             |       |       |       |       |
|-------|------------|------------|------------|-------------|-------|-------|-------|-------|
| CA    | 3.49±2.45  | 24.43±4.23 | 5.5±2.14   | 17.83±8     | 0.002 | 0.268 | 0.234 | 0.429 |
| CDCA  | 0.16±0.09  | 0.91±0.15  | 0.11±0.04  | ND          | 0.002 | 0.048 | 1     | 0.004 |
| αMCA  | 5.03±1.85  | 10.78±1.69 | 4.78±0.48  | 1.56±0.31   | 0.041 | 0.003 | 0.051 | 0.004 |
| βMCA  | 8.68±2.68  | 39.68±3.93 | 8.06±0.83  | 18.48±7.55  | 0.002 | 0.639 | 0.445 | 0.052 |
| UDCA  | ND         | 0.94±0.13  | 0.01±0.01  | ND          | -     | -     | -     | -     |
| TCA   | 0.43±0.12  | ND         | 0.18±0.06  | 0.72±0.38   | -     | 0.343 | 0.035 | -     |
| TαMCA | 0.11±0.02  | 0.72±0.3   | 0.08±0.02  | ND          | 0.065 | 0.003 | 0.295 | 0.017 |
| TβMCA | 0.57±0.14  | 9.13±4.98  | 0.22±0.05  | ND          | 0.009 | 0.003 | 0.035 | 0.004 |
| DCA   | 20.82±3.34 | 0.1±0.01   | 22.56±1.89 | 35.85±18.23 | 0.002 | 0.639 | 1     | 0.004 |
| LCA   | 2.2±0.4    | ND         | 0.92±0.17  | 0.57±0.36   | -     | 0.043 | 0.051 | -     |
| ωMCA  | 55.7±5.1   | 12.93±3.58 | 53.85±2.55 | 23.03±8.15  | 0.002 | 0.03  | 0.534 | 0.429 |
| TDCA  | 0.13±0.03  | ND         | 0.45±0.16  | 0.05±0.03   | 0.002 | 0.003 | 0.051 | 0.329 |

Ileum

|       |            |            |            |            |       |        |        |       |
|-------|------------|------------|------------|------------|-------|--------|--------|-------|
| CA    | 11.09±5.46 | 32.39±4.14 | 24.6±4.07  | 55.75±8.19 | 0.022 | 0.01   | 0.04   | 0.059 |
| CDCA  | 0.31±0.15  | 0.75±0.19  | 0.13±0.03  | 0.12±0.03  | 0.022 | 0.798  | 0.281  | 0.001 |
| αMCA  | 1.12±0.59  | 6.67±2.49  | 0.76±0.16  | 0.61±0.2   | 0.051 | 0.574  | 0.694  | 0.02  |
| βMCA  | 2.13±0.84  | 12.74±4.2  | 1.74±0.38  | 4.36±1.6   | 0.035 | 0.574  | 1      | 0.081 |
| UDCA  | 0.13±0.05  | 0.57±0.17  | 0.08±0.02  | 0.04±0.01  | 0.051 | 0.13   | 0.694  | 0.001 |
| TCA   | 29.24±4.79 | 13.39±8.43 | 38.78±5.29 | 25.85±8.66 | 0.073 | 0.234  | 0.232  | 0.414 |
| TCDCa | 1.4±0.34   | 0.71±0.12  | 0.35±0.05  | 0.16±0.07  | 0.234 | 0.038  | <0.001 | 0.001 |
| TαMCA | 7.56±1.14  | 4.22±0.53  | 4.19±0.62  | 2.02±1.17  | 0.073 | 0.05   | 0.029  | 0.142 |
| TβMCA | 37.68±5.33 | 23.05±7.74 | 19.71±2.36 | 5.31±1.57  | 0.101 | <0.001 | 0.021  | 0.029 |
| TUDCA | 1.56±0.37  | 0.86±0.23  | 0.51±0.09  | 0.3±0.1    | 0.234 | 0.105  | 0.054  | 0.043 |
| DCA   | 0.92±0.54  | 0.06±0.02  | 1.17±0.23  | 1.15±0.56  | 0.001 | 0.328  | 0.094  | 0.029 |
| ωMCA  | 4.89±1.66  | 4.5±1.92   | 4.98±1.02  | 3.84±1.6   | 0.366 | 0.279  | 0.867  | 1     |

|       |           |           |           |           |       |        |       |       |
|-------|-----------|-----------|-----------|-----------|-------|--------|-------|-------|
| TDCA  | 1.66±0.48 | 0.06±0.03 | 2.83±0.93 | 0.41±0.31 | 0.001 | 0.005  | 0.152 | 0.142 |
| TLCA  | 0.06±0.01 | ND        | 0.03±0    | 0.01±0    | -     | <0.001 | 0.072 | -     |
| TωMCA | 0.25±0.06 | 0.04±0.02 | 0.13±0.02 | 0.06±0.06 | 0.008 | 0.01   | 0.232 | 0.181 |

---

Data are presented as mean±SEM. ND, not detected. P values calculated by Mann-Whitney U test

**ESM Table 6. Metabolic improvements in human type 2 diabetes pre and post AGI treatment**

|                          | Pre AGI treatment | Post AGI treatment | <i>p</i> value |
|--------------------------|-------------------|--------------------|----------------|
| Age (years)              | 53.32±8.49        | /                  | /              |
| Sex (male)               | 7                 | /                  | /              |
| Height (cm)              | 171.10±7.22       | /                  | /              |
| BW (kg)                  | 77.19±10.35       | 73.89±10.73        | 0.0217         |
| BMI (kg/m <sup>2</sup> ) | 26.34±3.03        | 25.22±3.37         | 0.0161         |
| G0 (mmol/l)              | 7.97±1.33         | 6.35±0.74          | 0.005          |
| G30 (mmol/l)             | 10.58±1.80        | 7.65±1.74          | 0.0012         |
| G60 (mmol/l)             | 14.40±2.52        | 9.84±1.96          | 0.0004         |
| G120 (mmol/l)            | 14.66±2.75        | 9.65±1.75          | 0.0002         |
| G180 (mmol/l)            | 11.88±3.64        | 7.66±2.70          | 0.0138         |
| INS0 (pmol/l)            | 82.33±46.11       | 59.79±36.69        | 0.0097         |
| INS30 (pmol/l)           | 168.45±115.56     | 129.75±96.88       | 0.274          |
| INS60 (pmol/l)           | 347.14±207.41     | 242.49±158.40      | 0.1845         |
| INS120 (pmol/l)          | 458.81±279.92     | 283.20±141.40      | 0.0265         |
| INS180 (pmol/l)          | 337.97±234.06     | 212.37±167.38      | 0.0017         |
| CP0 (nmol/l)             | 1.01±0.28         | 0.83±0.24          | 0.0493         |
| CP30 (nmol/l)            | 1.38±0.47         | 1.10±0.36          | 0.0606         |
| CP60 (nmol/l)            | 2.07±0.74         | 1.61±0.54          | 0.0631         |
| CP120 (nmol/l)           | 3.03±0.91         | 2.34±0.47          | 0.0129         |
| CP180(nmol/l)            | 2.78±1.02         | 2.06±0.73          | 0.0041         |
| HbA1C (%)                | 7.95±0.92         | 6.20±0.43          | 0.0004         |
| HbA1C (mmol/mol)         | 49.29±5.704       | 38.44±2.66         | 0.0004         |
| HOMAIR (pmol×mmol)       | 28.65±18.81       | 17.47±11.98        | 0.0083         |

Paired t test, *p*<0.05 considered to be statistical significance

BW: body weight, BMI: body mass index, G0-G180: blood glucose levels at 0, 30, 60, 120, 180 min during oral glucose tolerance, INS0-180, serum insulin levels at 0, 30, 60, 120, 180 min during oral glucose tolerance, CP0-CP180, serum C-peptide at 0, 30, 60, 120, 180 min during oral glucose tolerance, HbA1C, haemoglobin A1C, HOMAIR, homeostasis model assessment index for insulin resistance.

**ESM Table 7. Two step hyperglycaemia clamp**

|                                    |                 | pre-week 0     | post-week 12   | <i>p</i> |
|------------------------------------|-----------------|----------------|----------------|----------|
| <b>Step 1</b>                      |                 |                |                |          |
| <b>Ave BG mmol/l</b>               |                 | 14.6±0.2       | 14.3±0.2       | 0.006    |
| <b>GIR (mmol/l per kg per min)</b> |                 | 6.0±0.5        | 7.9±0.8        | 0.004    |
| <b>AUCins</b>                      | <b>Phase I</b>  | 1039.2±123.3   | 1051.7±163.0   | 0.945    |
| <b>(pmol/l per min)</b>            | <b>Phase II</b> | 8389.3±868.5   | 9378.4±2083.2  | 0.583    |
| <b>Step 2</b>                      |                 |                |                |          |
| <b>Ave BG mmol/l</b>               |                 | 15.1±0.1       | 14.0±0.2       | <0.001   |
| <b>GIR (mmol/l per kg per min)</b> |                 | 4.5±0.5        | 11.7±0.8       | <0.001   |
| <b>AUCins</b>                      | <b>Phase I</b>  | 3266.5±514.8   | 4640.3±970.1   | 0.077    |
| <b>(pmol/l per min)</b>            | <b>Phase II</b> | 17871.0±2795.8 | 23421.1±4367.8 | 0.254    |

12 weeks of AGI treatment significantly decreased GIR of the clamp and showed a trend of improved acute insulin secretion (Phase I) in the Step 2. Ave BG: average blood glucose level clamped during the experiment. GIR: glucose infusion rate; AUCins: area under curve for multiple measurements of plasma insulin level. Data were presented as mean ± S.D., Student t test.

**ESM Table 8. Islet lipotoxicity related genes**

| <b>Symbol</b> | <b>GeneID</b> | <b>LnRatio(WA/WT)</b> | <b>q-value</b> | <b>Up/Down</b> | <b>References</b>                                          |
|---------------|---------------|-----------------------|----------------|----------------|------------------------------------------------------------|
| <i>Cat</i>    | 12359         | 0.134842081           | 0.0189369      | -              | Kace J. Prentice et al.<br>Cell Metabolism.<br>(2014) [11] |
| <i>Cpe</i>    | 12876         | 0.049131061           | 2.70E-74       | -              |                                                            |
| <i>Ucp2</i>   | 22228         | -0.246916569          | 1.17E-197      | -              |                                                            |
| <i>Acadvl</i> | 11370         | -0.144090208          | 1.13E-12       | -              | Tianyi Tang et al. Cell<br>Metabolism. (2013)<br>[12]      |
| <i>Cpt1b</i>  | 12895         | 0.278957081           | 0.0042817      | -              |                                                            |
| <i>Cpt2</i>   | 12896         | 0.028745675           | 0.0723977      | -              |                                                            |
| <i>Hadhb</i>  | 231086        | 0.007239168           | 0.2270785      | -              |                                                            |
| <i>Mdh2</i>   | 17448         | 0.056078276           | 0.0001881      | -              |                                                            |
| <i>Pdk4</i>   | 27273         | 0.28485563            | 3.32E-16       | -              |                                                            |
| <i>Pnpla2</i> | 66853         | 0.181126939           | 3.49E-17       | -              |                                                            |
| <i>Sdhb</i>   | 67680         | -0.030436229          | 0.0943754      | -              |                                                            |
| <i>Abcc8</i>  | 20927         | 0.091641918           | 2.78E-127      | -              | Marc Prentki et al. Cell<br>Metabolism. (2013)<br>[13]     |
| <i>Abhd6</i>  | 66082         | -0.075559508          | 0.0139342      | -              |                                                            |
| <i>Cpt1a</i>  | 12894         | -0.045296797          | 0.0024636      | -              |                                                            |
| <i>Cpt1c</i>  | 78070         | 0.123585756           | 0.0029551      | -              |                                                            |
| <i>ldh1</i>   | 15926         | 0.146786014           | 3.95E-06       | -              |                                                            |

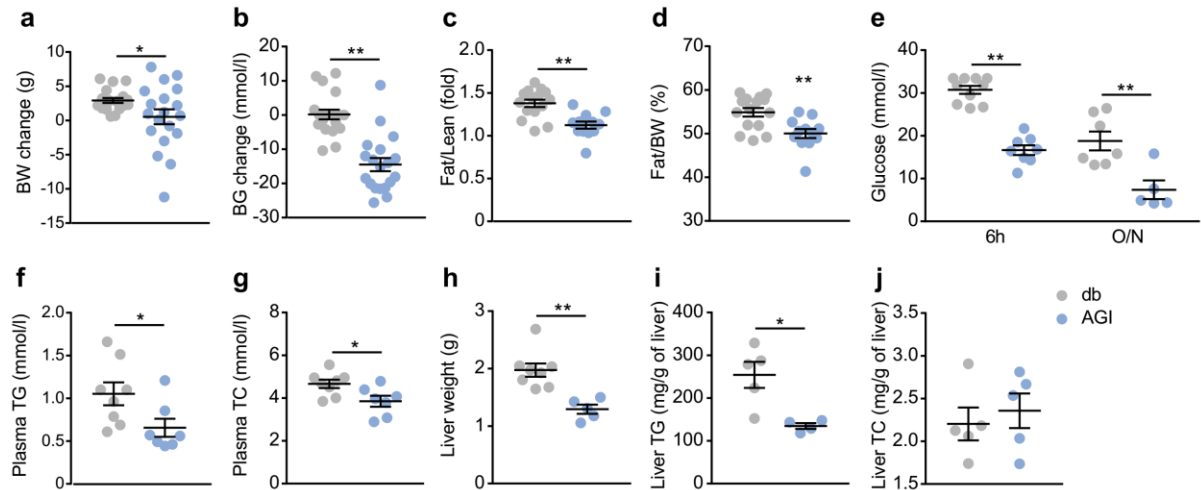

**ESM Figure 1. Other metabolic phenotypes in *db/db* mice after AGI treatment.** (a) AGI reduced total body weight (BW) after 24 days treatment. n=19-24 each group. (b) AGI reduced blood glucose (BG) levels after 24 days treatment. n=19-24 each group. (c) AGI reduced ratio of fat vs lean mass, n=12-15 each group. (d) AGI reduced body fat composition, n=12-15 each group. (e) AGI reduced fasting blood glucose (FBG) after treatment, 6 hours (6h) fasting (left) and overnight (O/N) fasting (right), n=5-12 each group. AGI reduced blood lipids of mice after treatment: triglycerides (TG) (f) and total cholesterol (TC) (g), n=7-11 each group. (h) AGI reduced Liver weight, n=5-8 each group. AGI reduced liver content of TG (i) and TC (j), n=4-8 each group. Grey circles, db group (Veh treated); blue circles, AGI group (AGI treated). Data are presented as mean  $\pm$  SEM. \*  $p < 0.05$ , \*\*  $p < 0.01$ , two tailed Student's t test.

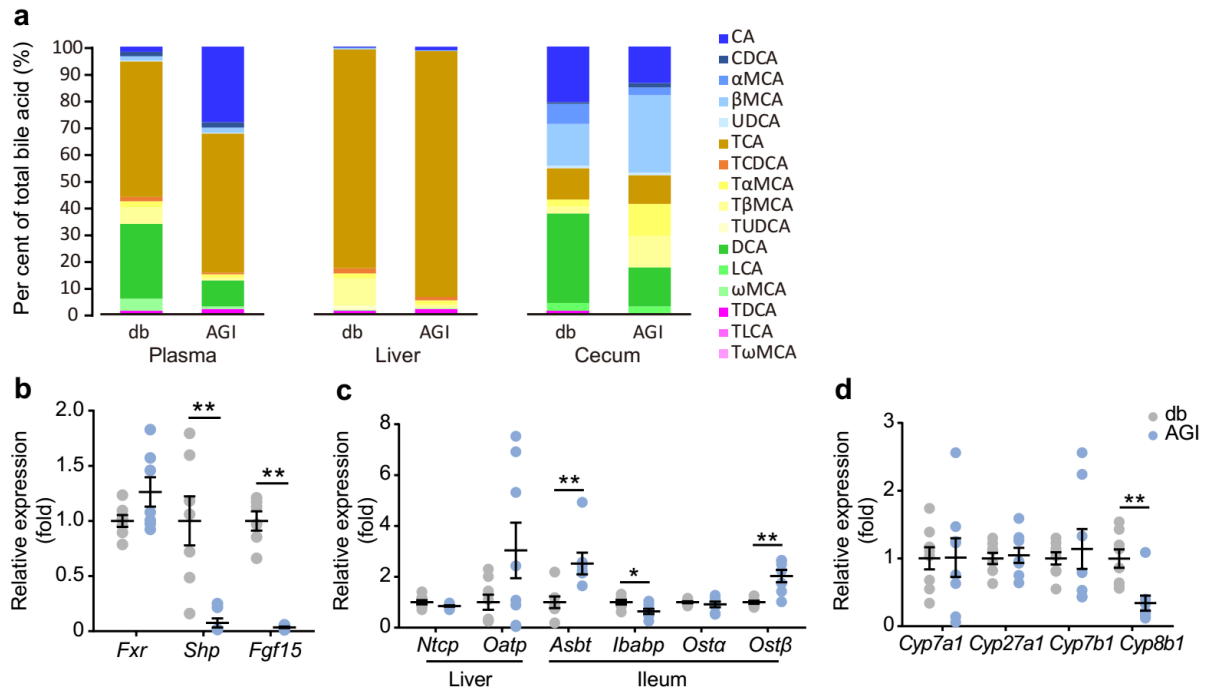

**ESM Figure 2. AGI changed enterohepatic BA component and BA signalling in *db/db* mice.** (a) Stacked bar plot of BA pools in plasma, liver and cecum content, n=7-9 each group. (b-d) Changes of mRNA levels of genes regulating ileum FXR signalling (b), BA transportation (c) and liver BA synthesis (d), n=7 each group. Grey circles, db group (Veh treated); blue circles, AGI group (AGI treated). Data are presented as mean  $\pm$  SEM. \*\*  $p < 0.01$ , two tailed Student's t test. CA, cholic acid; CDCA, chenodeoxycholic acid; MCA, murine cholic acid; UDCA, ursodeoxycholic acid; TCA, taurine conjugated CA; TCDCA, taurine conjugated CA; T $\alpha$ MCA, taurine conjugated alpha MCA; T $\beta$ MCA, taurine conjugated beta MCA; TUDCA, taurine conjugated UDCA; DCA, deoxycholic acid; LCA, lithocholic acid; TDCA, taurine conjugated DCA; TLCA, taurine conjugated LCA; T $\omega$ MCA, taurine conjugated omega MCA.



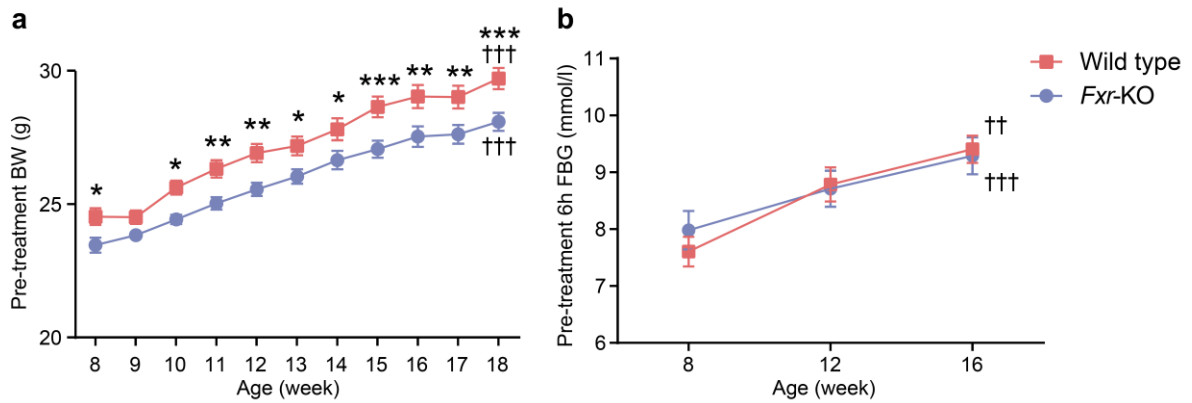

**ESM Figure 3. Metabolic phenotype of Wild type and *Fxr*-KO mice after HFHS diet before AGI treatment.** (a) Body weight (BW) every week on HFHS diet. n=20-21 each group, (b) Fasting blood glucose (FBG) values detected every 4 weeks on HFHS diet. Blue circles: *Fxr*-KO, *Fxr* knockout mice; red square: wild type. n=20-21 each group. \*  $p < 0.05$ , \*\*  $p < 0.01$ , \*\*\*  $p < 0.001$ , wild type vs *Fxr*-KO mice at each time point of measurement, ††  $p < 0.01$ , †††  $p < 0.001$ , vs baseline value in each genotype, two-way ANOVA. Data are presented as mean  $\pm$  SEM.

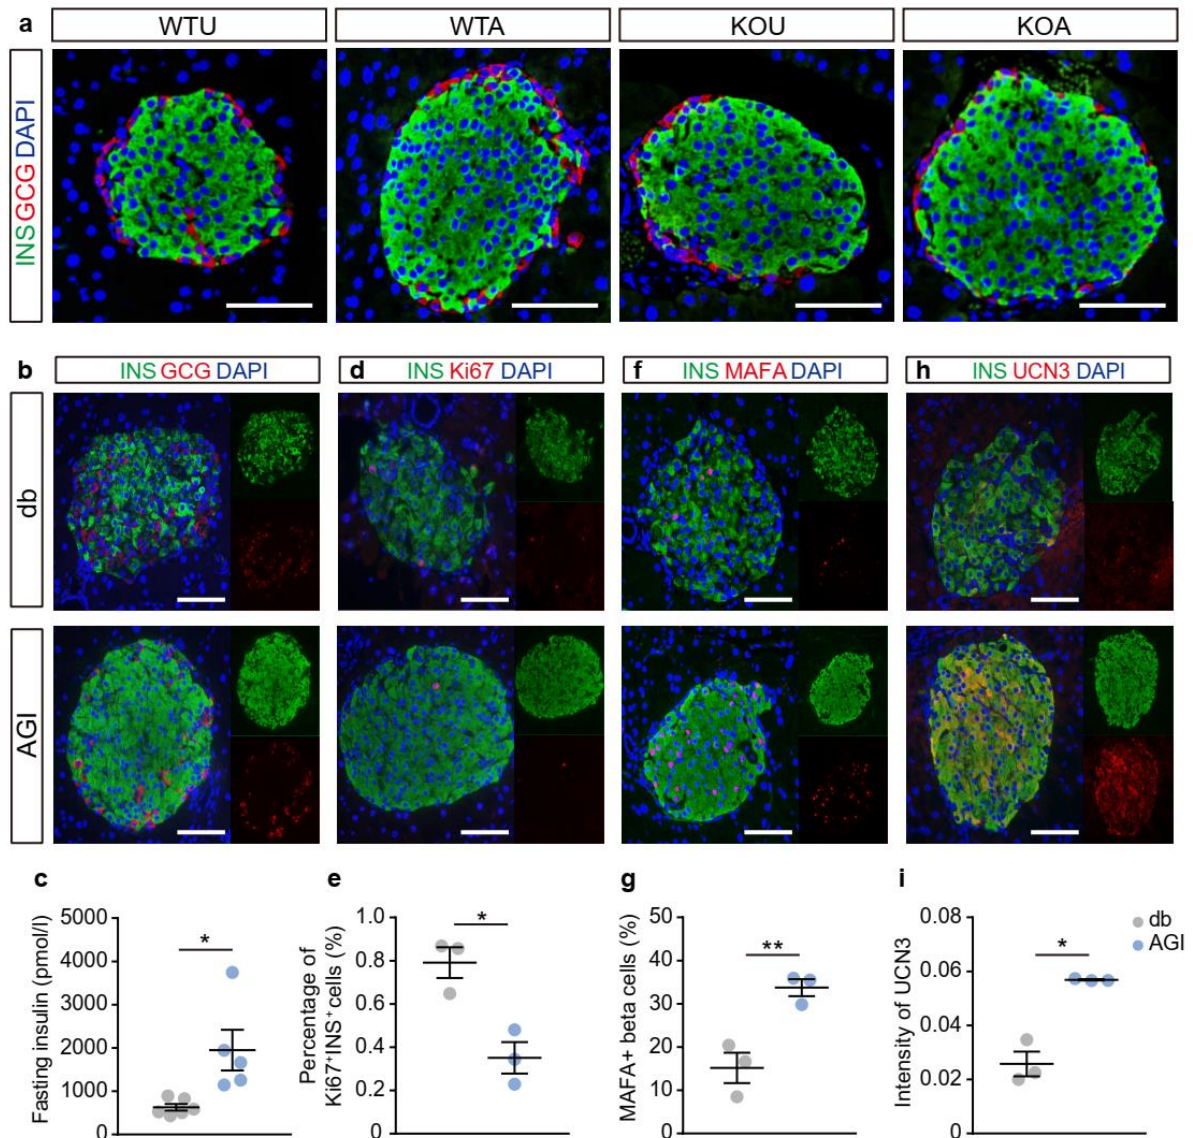

**ESM Figure 4. The morphology and function changes of endocrine pancreas after AGI treatment.** (a) Islet structure, representative image of pancreas insulin/glucagon immunolabeling of HFHS fed mice. n=3 each group. Scale bars, 100  $\mu$ m. (b) Islet structure, representative image of pancreas insulin/glucagon immunolabeling of *db/db* mice, n=3 each group. Scale bars, 100  $\mu$ m. (c) Fasting plasma insulin levels after treating AGI, n=5 each group. (d-e) Representative figures of islet Ki67 immunolabelling (d) and comparison of Ki67 positive beta cell percentage (e), n=3 each group. Scale bars, 100  $\mu$ m. (f-g) Representative figures of islet MafA immunolabeling (f) and comparison of MafA positive beta cell percentage (g), n=3 each group. Scale bars, 100  $\mu$ m. (h-i) Representative figures of islet UCN3 immunolabeling (h) and calculation of staining intensity (i) in beta cells. n=3 each group. Scale bars, 100  $\mu$ m. MafA, v-maf musculoaponeurotic fibrosarcoma oncogene family, protein A; UCN3, Urocortin 3. Data are presented as mean  $\pm$  SEM. \*  $p < 0.05$ , \*\*  $p < 0.01$ , db vs AGI, two tailed Student's t-test. Grey circles, db group (Veh treated); blue circles, AGI group (AGI treated).

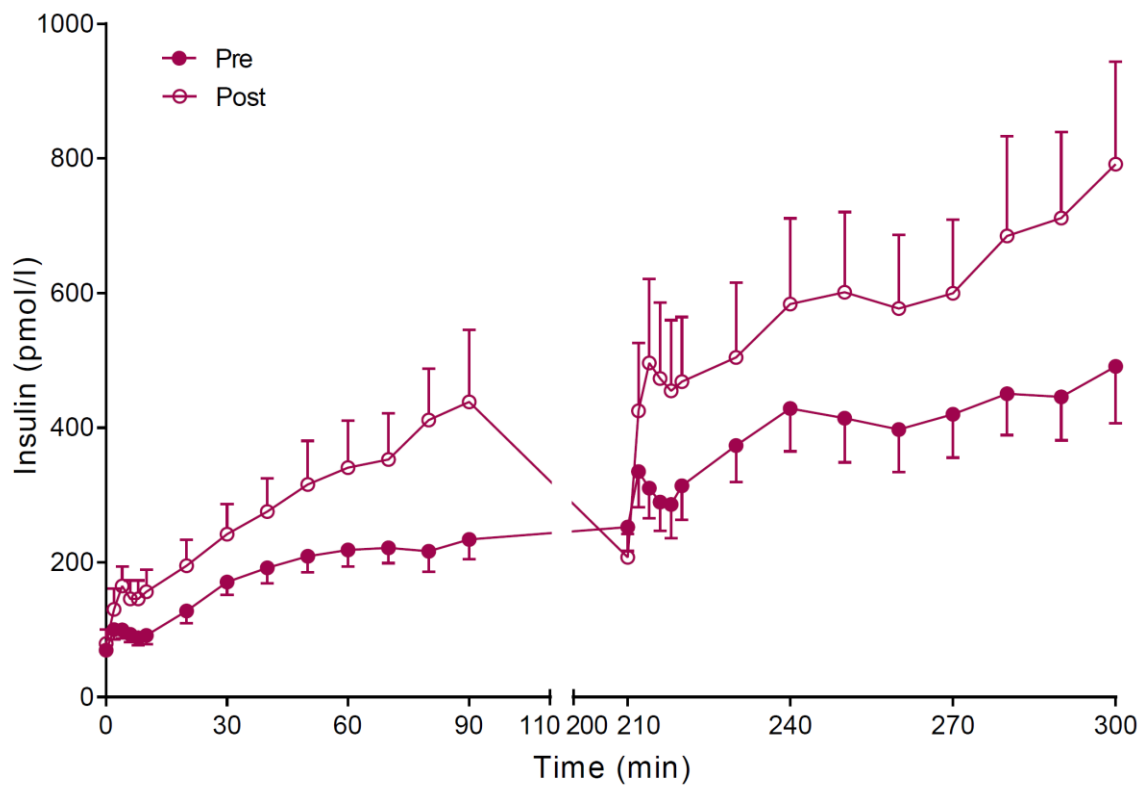

**ESM Figure 5. Two-step hyperglycaemic clamp in human type 2 diabetes treated with AGI.** Plot of insulin secretion responding to hyperglycaemia in type 2 diabetes patients before and after 3 months AGI treatment. Insulin levels were measured during the clamp experiment at multiple time points. Full red circles, Pre: pre-treatment levels, n=10; Empty red circles, Post: post treatment levels, n=9. Data are presented as mean  $\pm$  SEM. Multiple t-test.

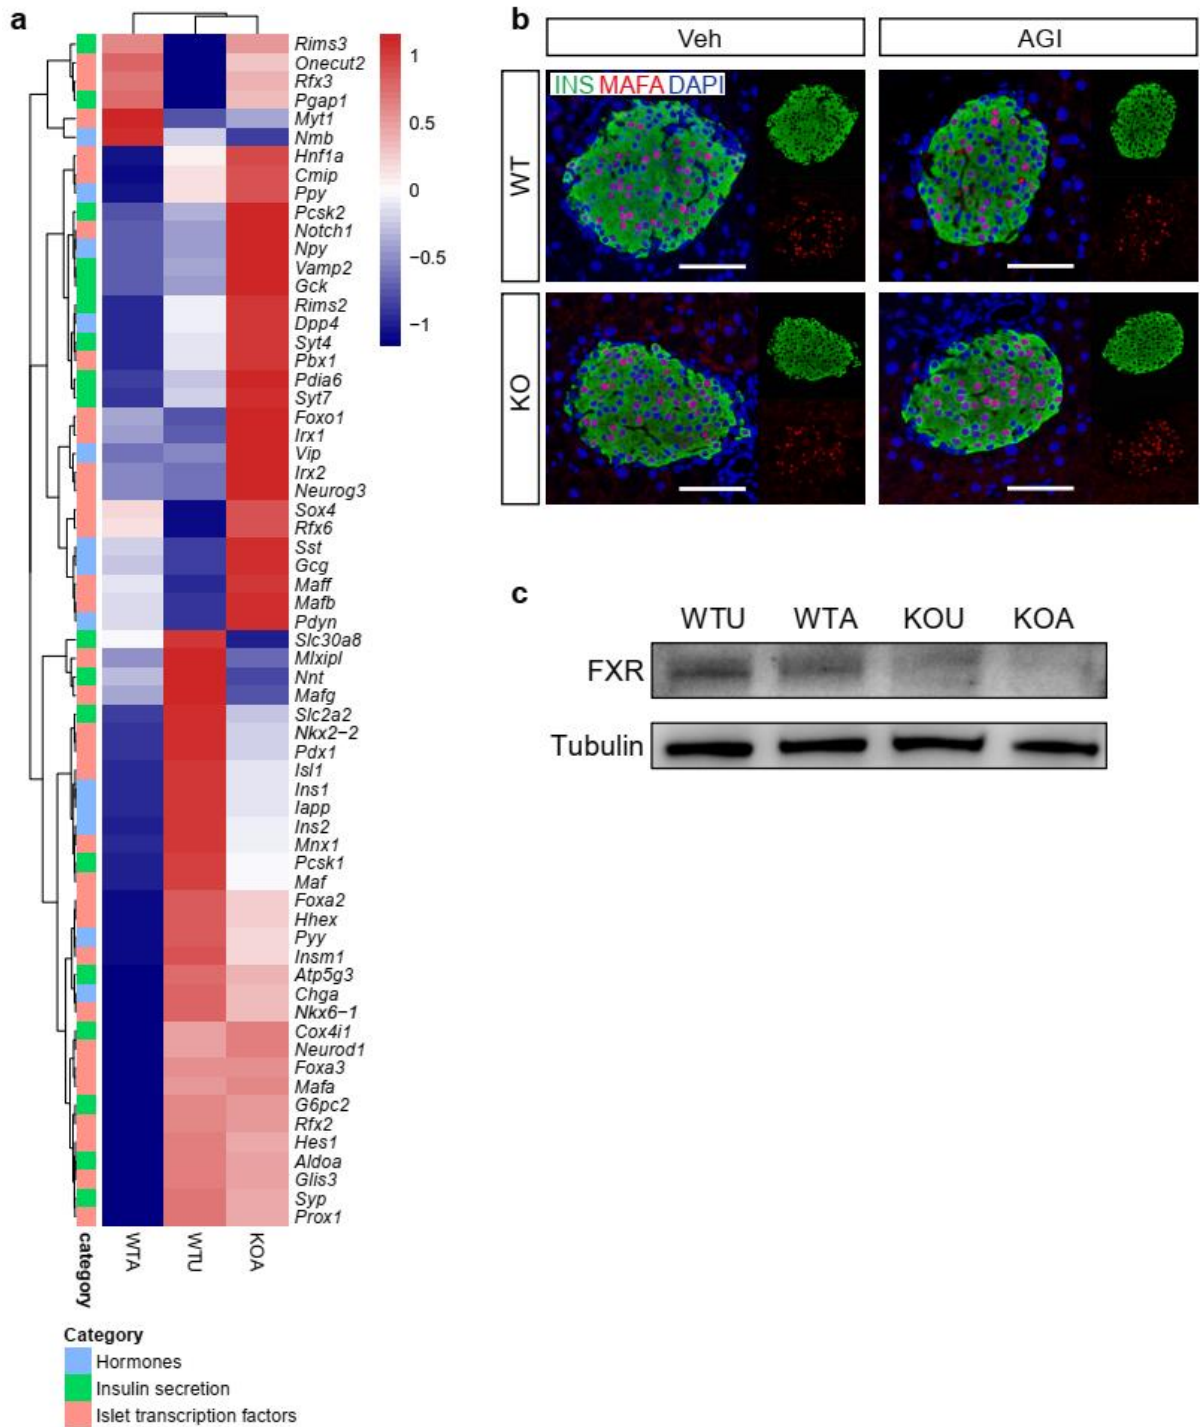

**ESM Figure 6. RNA sequencing data revealed changes of key islet TF expressions after AGI treatment.** (a) Heatmap of key islet TF expressions, n=3 each group, z-score of normalized relative expression of genes in row. (b) Representative image of immunolabeling of MafA and insulin in pancreatic islets of HFHS fed mice, n=3 each group. Scale bars, 100  $\mu$ m. (c) Western blot of FXR protein in islets of HFHS fed mice, n=3 each group.

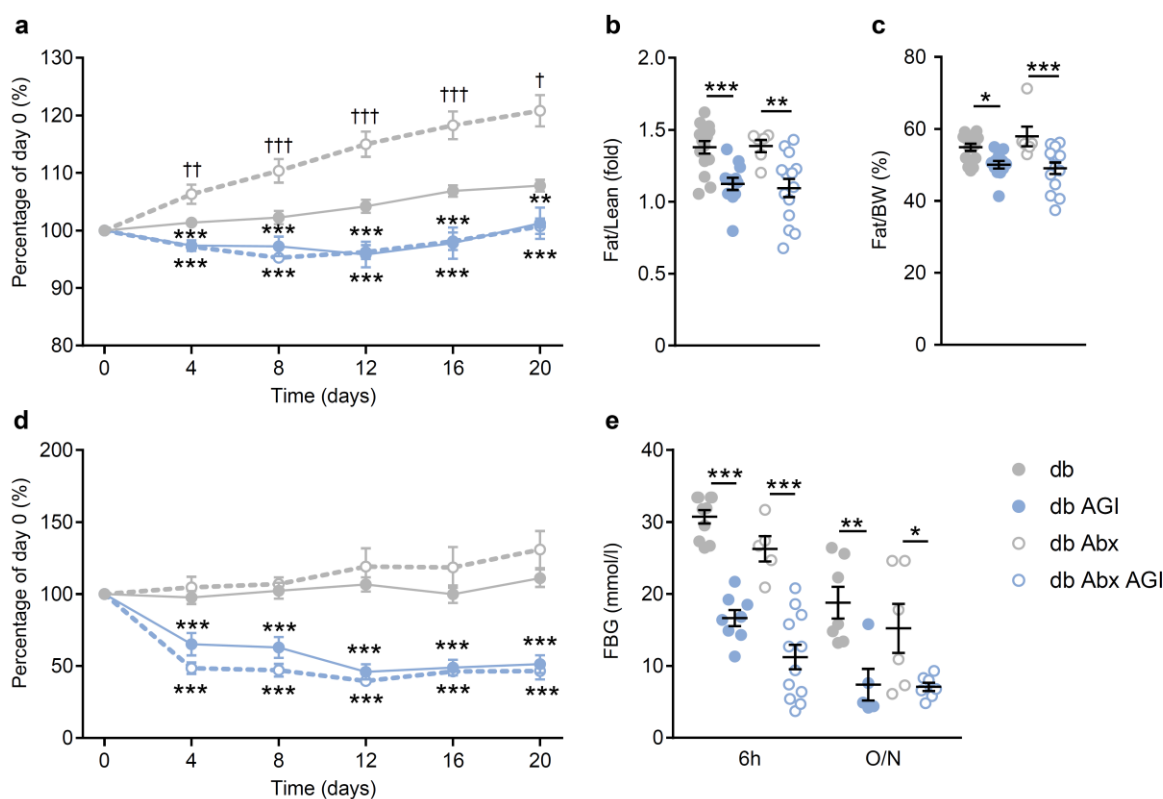

**ESM Figure 7. Metabolic phenotypes of *db/db* mice after Abx and AGI treatment.** (a) Change of body weight (BW) of baseline (db:  $38.4 \pm 1.0$  g, db AGI:  $39.1 \pm 0.9$  g, db Abx:  $34.5 \pm 0.7$  g, db Abx AGI:  $37.7 \pm 1.1$  g, mean  $\pm$  SEM) every 4 days during AGI treatment. (b) Ratio of fat vs lean mass, (c) Percentage of body fat mass in the end of AGI treatment. (d) Change of fed-state BG from baseline (db:  $28.0 \pm 1.1$  mmol/l, db AGI:  $29.9 \pm 0.8$  mmol/l, db Abx:  $24.8 \pm 1.4$  mmol/l, db Abx AGI:  $25.2 \pm 0.9$  mmol/l, mean  $\pm$  SEM) every 4 days during AGI treatment. (e) Fasting blood glucose (FBG) in the end of AGI treatment,  $n=6-25$  each group. Data are presented as mean  $\pm$  SEM. \*  $p < 0.05$ , \*\*  $p < 0.01$ , \*\*\*  $p < 0.001$ , db vs db AGI or db Abx vs db Abx AGI; †  $p < 0.05$ , ††  $p < 0.01$ , †††  $p < 0.001$  db vs db Abx, two-way ANOVA. Grey full circles: db group, untreated control *db/db* mice; blue full circles: db AGI group, AGI treated *db/db* mice; grey empty circles: db Abx group, untreated control *db/db* mice with pretreatment of antibiotics; blue empty circles: db Abx AGI group, AGI treated *db/db* mice with pretreatment of antibiotics.

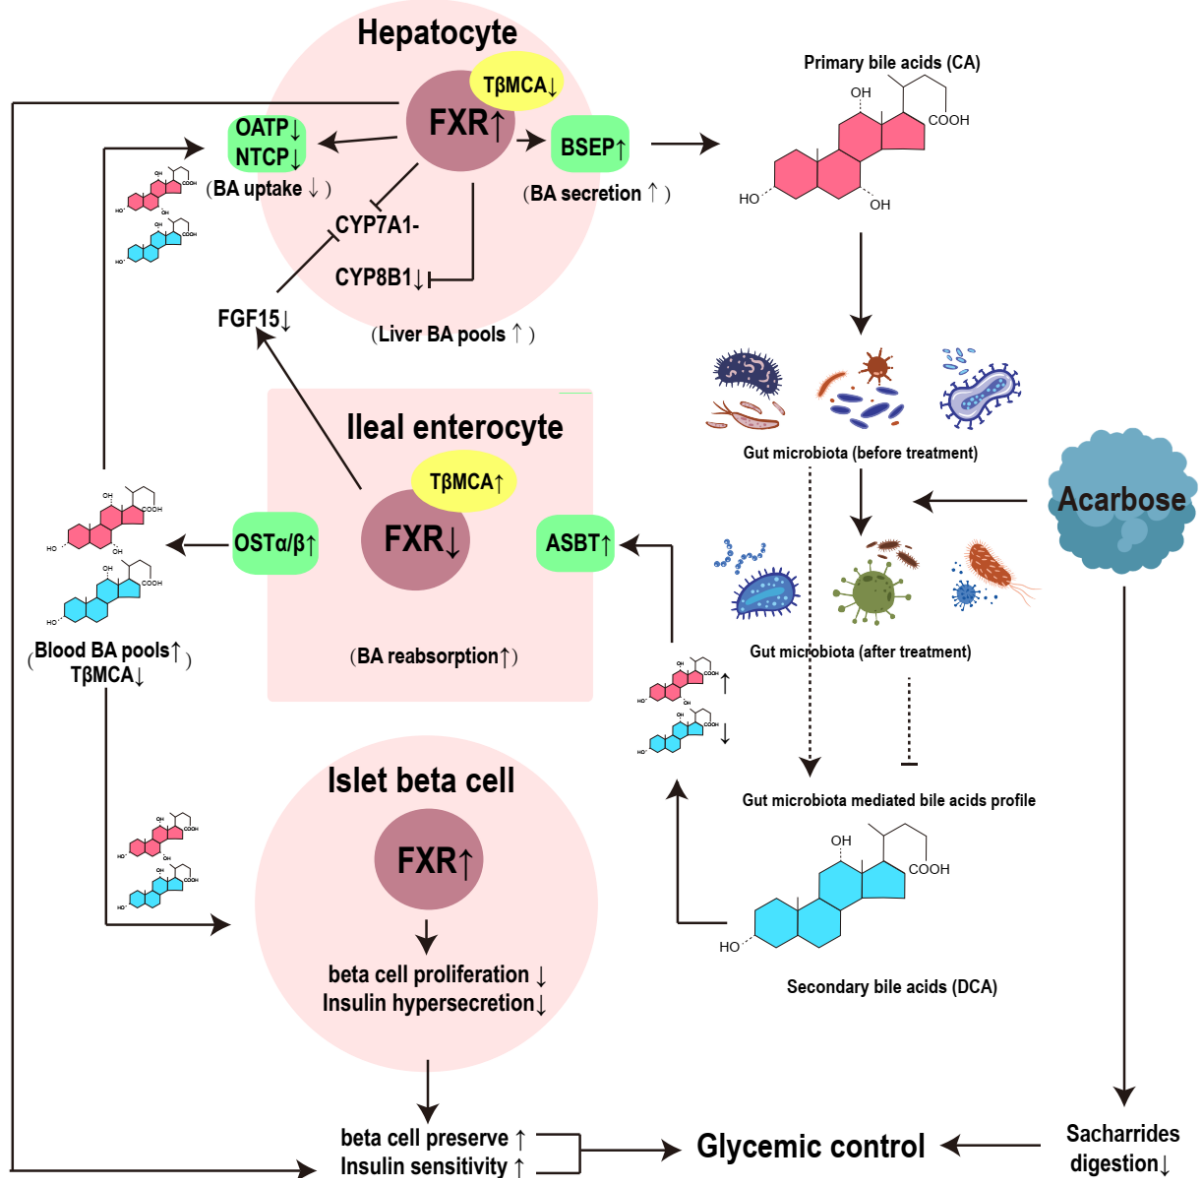

ESM Figure 8. Schematic map for mechanism underlying AGI regulating BA pool and signalling to improve its therapeutic effect.

## ESM References

- [1] Fu L, Qiu Y, Shen L, et al. (2018) The delayed effects of antibiotics in type 2 diabetes, friend or foe? *The Journal of endocrinology* 238(2): 137-149. 10.1530/joe-17-0709
- [2] Magoc T, Salzberg SL (2011) FLASH: fast length adjustment of short reads to improve genome assemblies. *Bioinformatics (Oxford, England)* 27(21): 2957-2963. 10.1093/bioinformatics/btr507
- [3] Amann RI, Binder BJ, Olson RJ, Chisholm SW, Devereux R, Stahl DA (1990) Combination of 16S rRNA-targeted oligonucleotide probes with flow cytometry for analyzing mixed microbial populations. *Applied and environmental microbiology* 56(6): 1919-1925
- [4] Suez J, Zmora N, Zilberman-Schapira G, et al. (2018) Post-Antibiotic Gut Mucosal Microbiome Reconstitution Is Impaired by Probiotics and Improved by Autologous FMT. *Cell* 174(6): 1406-1423.e1416. 10.1016/j.cell.2018.08.047
- [5] Gu Y, Lindner J, Kumar A, Yuan W, Magnuson MA (2011) Rictor/mTORC2 is essential for maintaining a balance between beta-cell proliferation and cell size. *Diabetes* 60(3): 827-837. 10.2337/db10-1194
- [6] Chen K, Liu J, Liu S, et al. (2017) Methyltransferase SETD2-Mediated Methylation of STAT1 Is Critical for Interferon Antiviral Activity. *Cell* 170(3): 492-506.e414. 10.1016/j.cell.2017.06.042
- [7] Wang L, Feng Z, Wang X, Wang X, Zhang X (2010) DEGseq: an R package for identifying differentially expressed genes from RNA-seq data. *Bioinformatics (Oxford, England)* 26(1): 136-138. 10.1093/bioinformatics/btp612
- [8] Storey JD, Tibshirani R (2003) Statistical significance for genomewide studies. *Proc Natl Acad Sci U S A* 100(16): 9440-9445. 10.1073/pnas.1530509100
- [9] Zhang Y, Chi J, Wang W, et al. (2015) Different effects of two dipeptidyl peptidase-4 inhibitors and glimepiride on beta-cell function in a newly designed two-step hyperglycemic clamp. *Journal of diabetes* 7(2): 213-221. 10.1111/1753-0407.12175
- [10] Gu Y, Wang X, Li J, et al. (2017) Analyses of gut microbiota and plasma bile acids enable stratification of patients for antidiabetic treatment. *Nature communications* 8(1): 1785. 10.1038/s41467-017-01682-2
- [11] Prentice KJ, Luu L, Allister EM, et al. (2014) The furan fatty acid metabolite CMPF is elevated in diabetes and induces beta cell dysfunction. *Cell metabolism* 19(4): 653-666. 10.1016/j.cmet.2014.03.008
- [12] Tang T, Abbott MJ, Ahmadian M, Lopes AB, Wang Y, Sul HS (2013) Desnutrin/ATGL activates PPARdelta to promote mitochondrial function for insulin secretion in islet beta cells. *Cell metabolism* 18(6): 883-895. 10.1016/j.cmet.2013.10.012
- [13] Prentki M, Matschinsky FM, Madiraju SR (2013) Metabolic signaling in fuel-induced insulin secretion. *Cell metabolism* 18(2): 162-185. 10.1016/j.cmet.2013.05.018
